# Supplementary material for: Single-cell sequencing reveals cellular landscape alterations in the airway mucosa of patients with pulmonary long COVID
Source: PubMed Central journal article supplement — Eur Respir J. 2024 Nov 28;64(5):2301947. doi: 10.1183/13993003.01947-2023 (PMC11602667; doi:10.1183/13993003.01947-2023), 2024-11-28

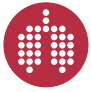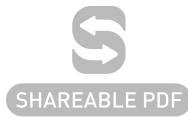

# Single-cell sequencing reveals cellular landscape alterations in the airway mucosa of patients with pulmonary long COVID

Firoozeh V. Gerayeli, Hye Yun Park, Stephen Milne , Xuan Li, Chen Xi Yang , Josie Tuong, Rachel L. Eddy, Seyed Milad Vahedi, Elizabeth Guinto , Chung Y. Cheung, Julia S.W. Yang, Cassie Gilchrist, Dina Yehia, Tara Stach, Hong Dang, Clarus Leung , Tawimas Shaipanich, Jonathon Leipsic, Graeme J. Koelwyn, Janice M. Leung and Don D. Sin

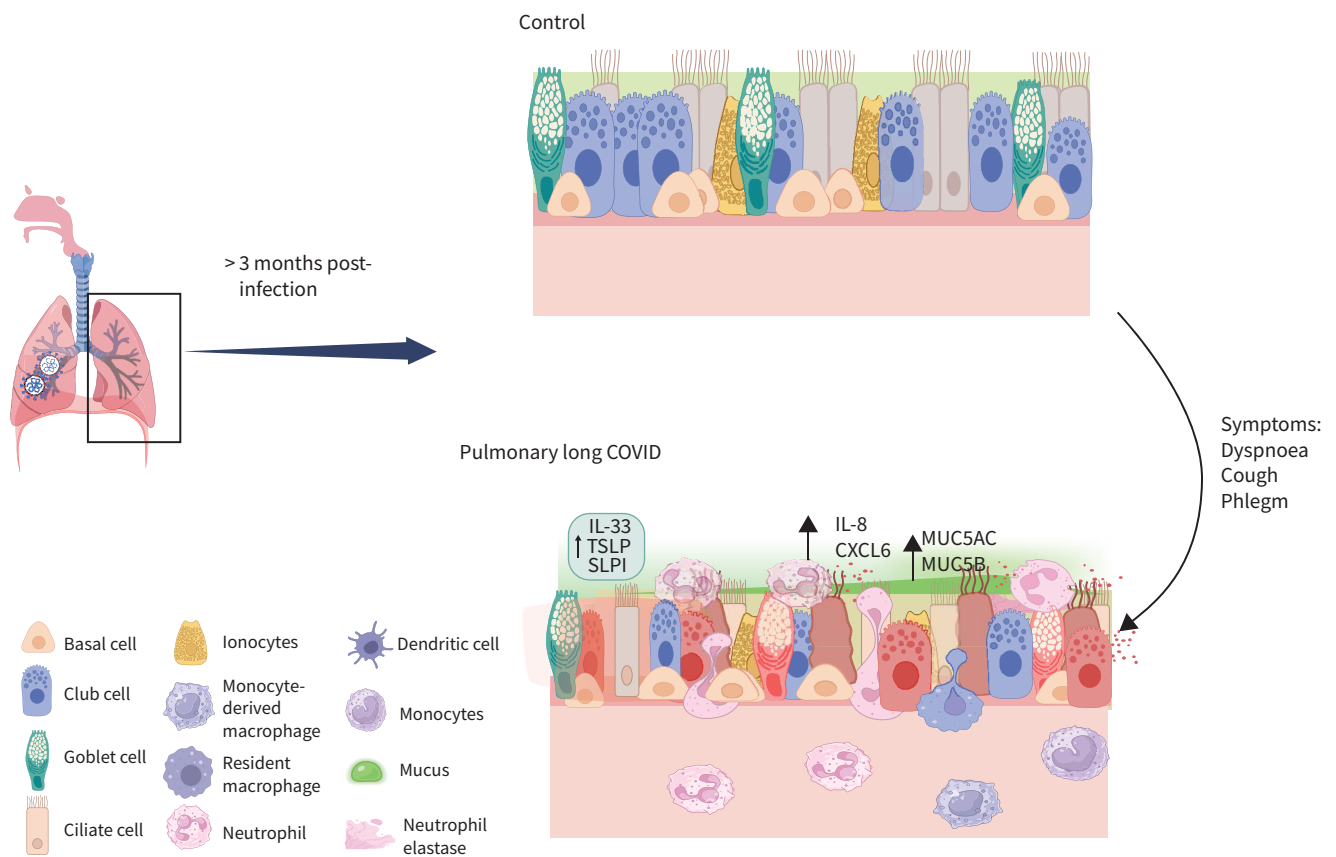

**GRAPHICAL ABSTRACT** Overview of the study. IL: interleukin; TSLP: thymic stromal lymphopoietin; SLPI: secretory leukocyte protease inhibitor.

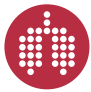

# Single-cell sequencing reveals cellular landscape alterations in the airway mucosa of patients with pulmonary long COVID

Firoozeh V. Gerayeli<sup>1,9</sup>, Hye Yun Park<sup>1,2,9</sup>, Stephen Milne <sup>1,3</sup>, Xuan Li<sup>1</sup>, Chen Xi Yang <sup>1</sup>, Josie Tuong<sup>1,4</sup>, Rachel L. Eddy<sup>1,5</sup>, Seyed Milad Vahedi<sup>1,4</sup>, Elizabeth Guinto <sup>1</sup>, Chung Y. Cheung<sup>1</sup>, Julia S.W. Yang<sup>1</sup>, Cassie Gilchrist<sup>1</sup>, Dina Yehia, Tara Stach<sup>6</sup>, Hong Dang<sup>7</sup>, Clarus Leung <sup>1,5</sup>, Tawimas Shaipanich<sup>5</sup>, Jonathon Leipsic<sup>8</sup>, Graeme J. Koelwyn<sup>1,4</sup>, Janice M. Leung<sup>1,5</sup> and Don D. Sin<sup>1,5</sup>

<sup>1</sup>Centre for Heart Lung Innovation, St Paul's Hospital, Vancouver, BC, Canada. <sup>2</sup>Division of Pulmonary and Critical Care Medicine, Department of Medicine, Samsung Medical Center, Sungkyunkwan University School of Medicine, Seoul, Republic of Korea. <sup>3</sup>Faculty of Medicine and Health, University of Sydney, Sydney, Australia. <sup>4</sup>Faculty of Health Sciences, Simon Fraser University, Burnaby, BC, Canada. <sup>5</sup>Division of Respiratory Medicine, Department of Medicine, University of British Columbia, Vancouver, BC, Canada. <sup>6</sup>Biomedical Research Centre, School of Biomedical Engineering, UBC, Vancouver, BC, Canada. <sup>7</sup>University of North Carolina Chapel Hill, Cystic Fibrosis and Pulmonary Disease Research and Treatment Center, Chapel Hill, NC, USA. <sup>8</sup>Department of Radiology, University of British Columbia, Vancouver, BC, Canada. <sup>9</sup>F.V. Gerayeli and H.Y. Park contributed equally as co-first authors.

Corresponding author: Don D. Sin ([Don.Sin@hli.ubc.ca](mailto:Don.Sin@hli.ubc.ca))

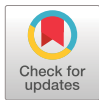

Shareable abstract (@ERSpublications)

Single-cell profiling shows infiltration of neutrophils with upregulation of inflammatory chemokines and mucin genes in the airway mucosa of patients with pulmonary long COVID, indicating persistent small airway inflammation in pulmonary long COVID <https://bit.ly/3XieXQN>

**Cite this article as:** Gerayeli FV, Park HY, Milne S, *et al.* Single-cell sequencing reveals cellular landscape alterations in the airway mucosa of patients with pulmonary long COVID. *Eur Respir J* 2024; 64: 2301947 [DOI: 10.1183/13993003.01947-2023].

This extracted version can be shared freely online.

Copyright ©The authors 2024.

This version is distributed under the terms of the Creative Commons Attribution Non-Commercial Licence 4.0. For commercial reproduction rights and permissions contact [permissions@ersnet.org](mailto:permissions@ersnet.org)

Received: 2 Nov 2023  
Accepted: 4 Sept 2024

## Abstract

**Aim** To elucidate the important cellular and molecular drivers of pulmonary long COVID, we generated a single-cell transcriptomic map of the airway mucosa using bronchial brushings from patients with long COVID who reported persistent pulmonary symptoms.

**Method** Adults with and without long COVID were recruited from the general community in Greater Vancouver, Canada. The cohort was divided into those with pulmonary long COVID, which was defined as persons with new or worsening respiratory symptoms following  $\geq 12$  weeks from their initial acute severe acute respiratory syndrome coronavirus 2 (SARS-CoV-2) infection (n=9); and control subjects defined as SARS-CoV-2 infected persons whose acute respiratory symptoms had fully resolved or individuals who had no history of acute coronavirus disease 2019 (COVID-19) (n=9). These participants underwent bronchoscopy from which a single cell suspension was created from bronchial brush samples and then sequenced.

**Results** A total of 56 906 cells were recovered for the downstream analysis, with 34 840 cells belonging to the pulmonary long COVID group, which strikingly showed a unique cluster of neutrophils in the pulmonary long COVID group (p<0.05). Ingenuity Pathway Analysis revealed that the neutrophil degranulation pathway was enriched across epithelial cell clusters. Differential gene expression analysis between the pulmonary long COVID and control groups demonstrated upregulation of inflammatory chemokines and epithelial barrier dysfunction across epithelial cell clusters, as well as over-expression of mucin genes across secretory cell clusters.

**Conclusion** A single-cell transcriptomic landscape of the small airways suggest that neutrophils may play a significant role in mediating the chronic small airway inflammation driving pulmonary symptoms of long COVID.

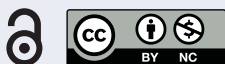

Supplement: ERJ-01947-2023.Shareable.pdf [file ERJ-01947-2023.Shareable.pdf]
