# Supplementary material for: Single-cell sequencing reveals cellular landscape alterations in the airway mucosa of patients with pulmonary long COVID
Source: PubMed Central journal article supplement — Eur Respir J. 2024 Nov 28;64(5):2301947. doi: 10.1183/13993003.01947-2023 (PMC11602667; doi:10.1183/13993003.01947-2023), 2024-11-28
Supplement: ERJ-01947-2023.Table_S1.pdf [file ERJ-01947-2023.Table_S1.pdf]

**Supplemental Table S1: Markers for manual cell annotation**

| Cell type     | Canonical/Legacy Markers                                                                                                |
|---------------|-------------------------------------------------------------------------------------------------------------------------|
| Basal         | KRT5+,TP63+,<br>KRT15                                                                                                   |
| Cycling basal | KRT5+ ,MKI67+,<br>TP63                                                                                                  |
| Suprabasal    | KRT5 <sup>mid</sup> ,<br>KRT17 <sup>low</sup> ,TP63 <sup>low</sup> ,<br>MUC5AC <sup>mid</sup> ,<br>MUC5B <sup>mid</sup> |
| Club          | SCGB1A1+<br><br>SCGB1A2+<br><br>MUC5B+                                                                                  |
| Goblet        | MUC5AC+                                                                                                                 |
| Deuterosomal  | DEUP1+ - FOXJ1+                                                                                                         |
| Multiciliated | DEUP1- - FOXJ1+                                                                                                         |
| Ciliated cell | FOXJ1, PIFO, TPPP3,<br>SNTN, FAM183A,<br>LRR1Q1, DNAH12,<br>C20orf85, , CAPS,                                           |

|                             |                                     |
|-----------------------------|-------------------------------------|
|                             | TUBB4B, DNAH5,<br>TSPAN1            |
| Mucous-ciliated cells       | FOXJ1, MUC5AC                       |
| Ionocyte                    | FOXI1, CFTR,<br>ASCL3, RARRES2      |
| Monocyte derived macrophage | CD16, CD14, CD68,<br>CD163, MRC1    |
| Neutrophil                  | FCGR3B, CSF3R,<br>NAMPT, HCAR2, PI3 |
